# Supplementary material
Source: publisher figshare collection journal article supplement (https://future-science-group.figshare.com/ndownloader/files/34203152)
Supplement: Supplementary file 1 [file 34203152]

Table S1. List of primers.

| Primer № | Sequence (5’ to 3’) |
| --- | --- |
| N619 | ggtggcagcagccaactcagctt |
| N1742 | attaggatccgtcgaccgcgaaattaatacgactca |
| N1734 | ggtcatccagcggatagttaat |
| N1762 | ggtaatgatcaccatgcggcacaatatatgcatcgccagatctcgatcctctacgcc |
| N1763 | tatactcgagttacagttcgttcttcggaatgtaatggtaatgatcaccatgcggc |
| pHis10-dir | tataccatggaaaagagatctcatcatcatcatcatcatcatcatcatcatggatccgactcagaagtcaatcaa |
| N1472 | tataccatggtgctgttactgctgttgaaggatggatccggtaccgtgagcaa |
| N1473 | tataccatgggtttgctgttactgctgttgaa |
| N1746 | aattctcgagttaggatccagcaatctgttctct |

* The underlined sequences are explained in the text
